# Supplementary material
Source: Springer Nature journal article supplement (https://www.springermedizin.de/resource/supplementary/12882_2012_415_MOESM3_ESM.pdf/9453528)

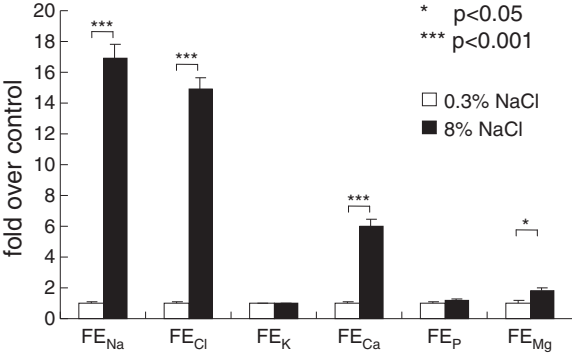

Supplement: MOESM3 [file 9453528]
